# Supplementary material for: Brief communication: Impact of the recent atmospheric circulationchange in summer on the future surface mass balance of theGreenland ice sheet
Source: Copernicus journal article supplement (doi:10.5194/tc-2018-65), 2018-04-17
Supplement: Supplementary file 1 [file tc-2018-65-supplement.pdf]

# **Brief communication: Impact of the recent atmospheric circulation change in summer on the future surface mass balance of the Greenland ice sheet**

A. Delhasse <sup>1</sup>, X. Fettweis <sup>1</sup>, C. Kittel <sup>1</sup>, C. Amory <sup>1</sup>, and C. Agosta <sup>1,2</sup>

<sup>1</sup>Laboratory of Climatology, Department of Geography, University of Liège, Liège, Belgium

<sup>2</sup>LSCE, University of Paris Saclay, Gif-sur-Yvette, France

*Correspondence to:* Alison Delhasse (alison.delhasse@uliege.be)

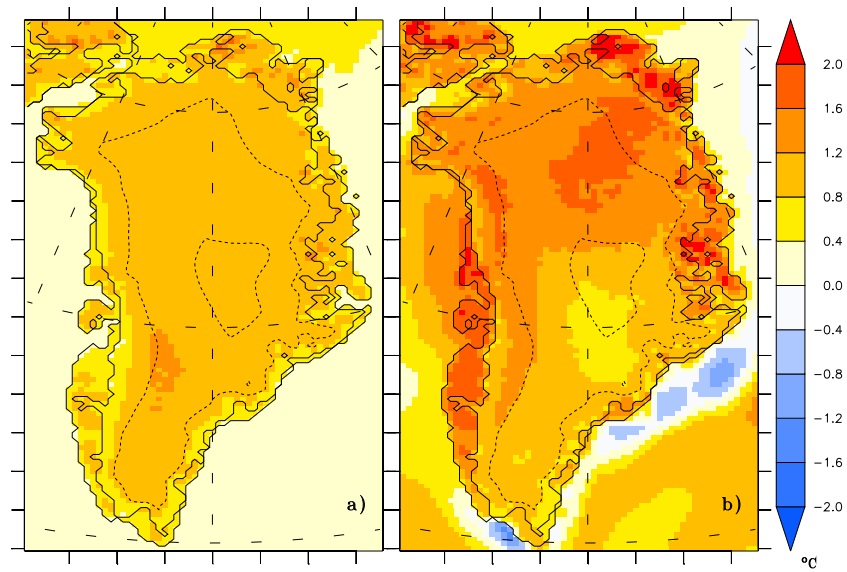

**Figure S1.** Mean anomalies of JJA near-surface temperature (°C) of MAR forced with ERA-Interim warmer of +1 °C over a) 1980 – 1999 and b) 2000 – 2016 compared to MAR forced with unaltered ERA-Interim over 1980 – 1999. Dashed lines are equal altitude lines of 2000 m and 3000 m.

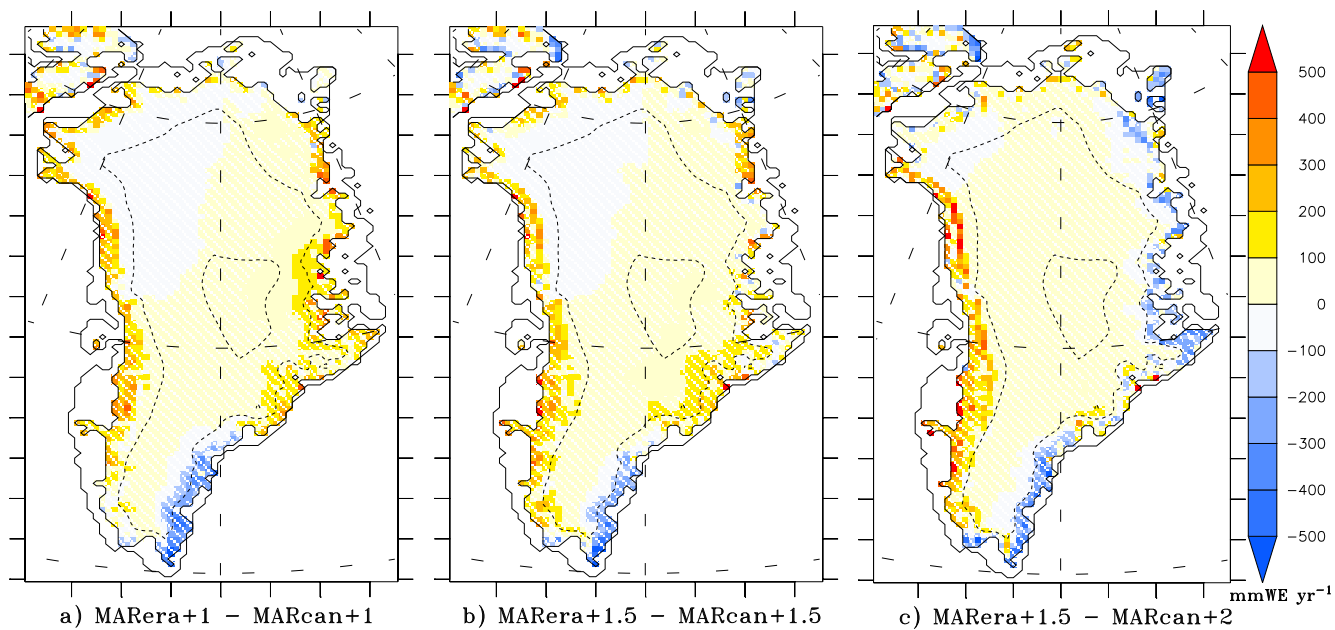

**Figure S2.** Differences of mean anomalies of annual SMB (in mmWE y<sup>-1</sup>) between a) MARera+1 and MARcan+1, b) MARera+1.5 and MARcan+1.5 and c) MARera+2 and MARcan+2. Areas where anomaly differences are smaller than the inter-annual variability (i.e. the standard deviation) of the simulation of MAR forced by unaltered ERA-Interim over 1980 – 1999 are hatched. Dashed lines are equal altitude lines of 2000 m and 3000 m. See Table S1 and Table S2 for abbreviations.

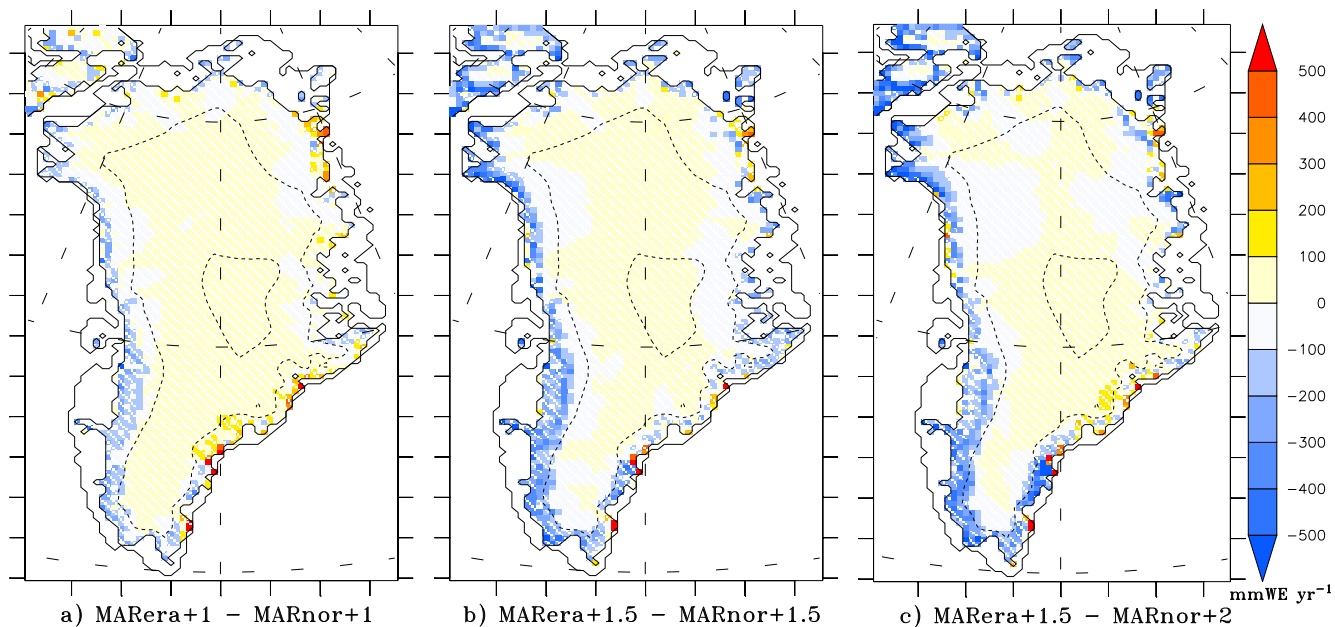

**Figure S3.** Same as Fig. S2 but for MARnor+x where x equals 1,1.5 or 2.

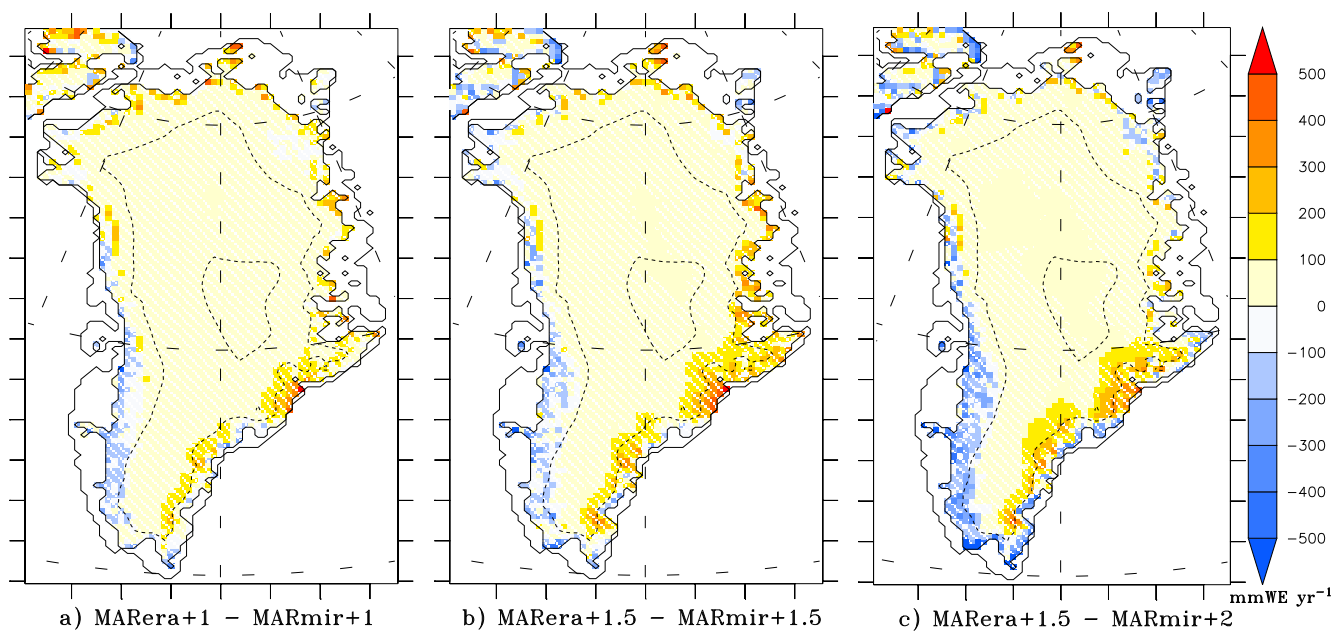

**Figure S4.** Same as Fig. S2 but for  $\text{MARmir}+x$  where  $x$  equals 1, 1.5 or 2.

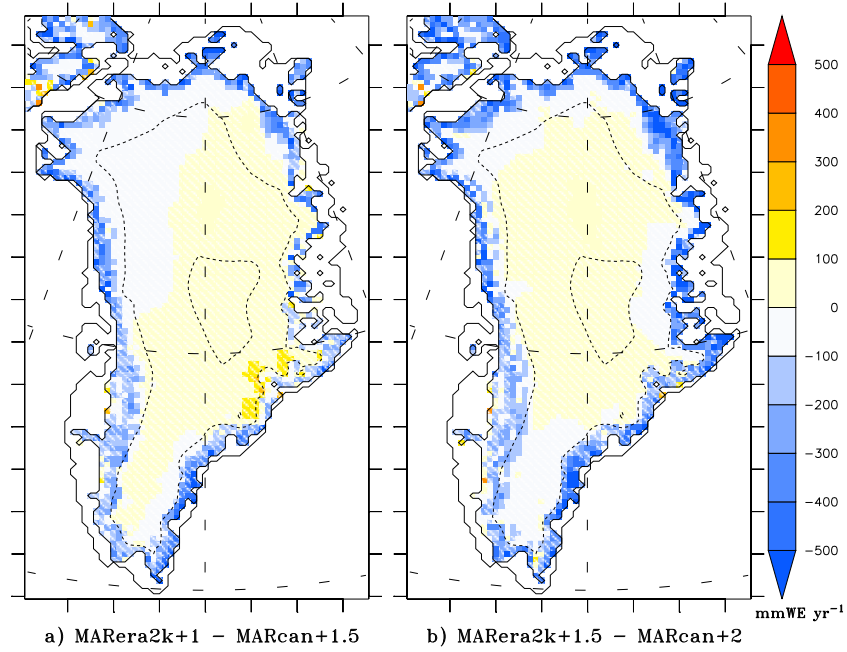

**Figure S5.** Differences of mean anomalies of annual SMB (in mmWE y<sup>-1</sup>) between a) MARera2K+1 and MARcan+1.5 and b) MARera2K+1.5 and MARcan+2. Areas where anomaly differences are smaller than the inter-annual variability (i.e. the standard deviation) of the simulation of MAR forced by unaltered ERA-Interim over 1980 – 1999 are hatched. Dashed lines are equal altitude lines of 2000 m and 3000 m. See Table S1 and Table S2 for abbreviations.

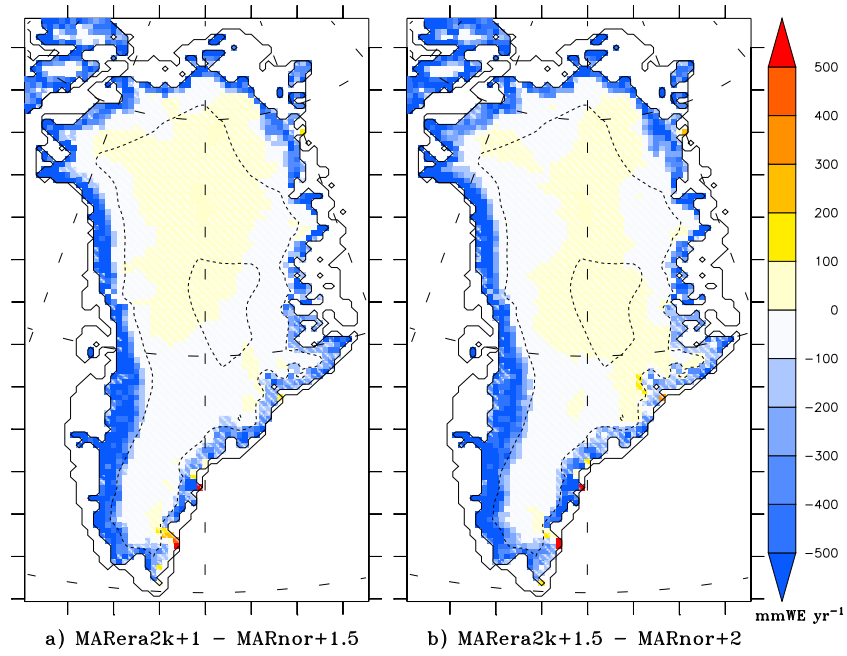

**Figure S6.** Same as Fig. S5 but for MARnor+x where x equals 1.5 or 2.

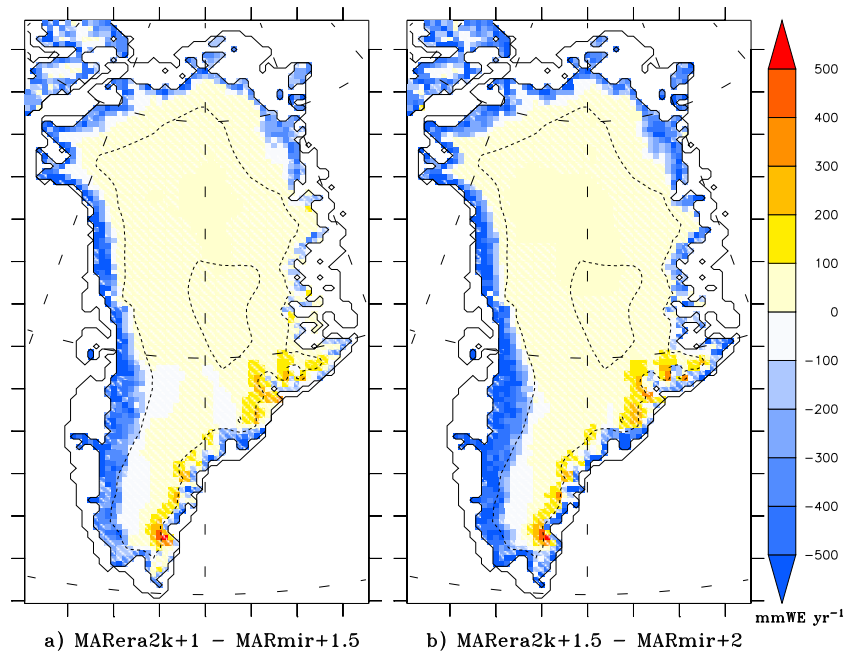

**Figure S7.** Same as Fig. S5 but for MARmir+x where x equals 1.5 or 2.

**Table S1.** Abbreviation description of reanalysis sensitivity experiments

|              |                                                                                                                                                                           |
|--------------|---------------------------------------------------------------------------------------------------------------------------------------------------------------------------|
| MARera+1     | Anomalies between MAR forced with the ERA-Interim reanalysis warmer of +1 °C over 1980 – 1999 and MAR forced with the unaltered ERA-Interim reanalysis over 1980 – 1999   |
| MARera+1.5   | Anomalies between MAR forced with the ERA-Interim reanalysis warmer of +1.5 °C over 1980 – 1999 and MAR forced with the unaltered ERA-Interim reanalysis over 1980 – 1999 |
| MARera+2     | Anomalies between MAR forced with the ERA-Interim reanalysis warmer of +2 °C over 1980 – 1999 and MAR forced with the unaltered ERA-Interim reanalysis over 1980 – 1999   |
| MARera2k     | Anomalies between MAR forced with the ERA-Interim over 2000 – 2016 and MAR forced with the unaltered ERA-Interim reanalysis over 1980 – 1999                              |
| MARera2k+1   | Anomalies between MAR forced with the ERA-Interim reanalysis warmer of +1 °C over 2000 – 2016 and MAR forced with the unaltered ERA-Interim reanalysis over 1980 – 1999   |
| MARera2k+1.5 | Anomalies between MAR forced with the ERA-Interim reanalysis warmer of +1.5 °C over 2000 – 2016 and MAR forced with the unaltered ERA-Interim reanalysis over 1980 – 1999 |
| MARera2k+2   | Anomalies between MAR forced with the ERA-Interim reanalysis warmer of +2 °C over 2000 – 2016 and MAR forced with the unaltered ERA-Interim reanalysis over 1980 – 1999   |

**Table S2.** Abbreviation description of GCM sensitivity experiments

|            |                                                                                                                                                                                     |
|------------|-------------------------------------------------------------------------------------------------------------------------------------------------------------------------------------|
| MARmir+1   | Anomalies between MAR forced with MIROC5 over a warmer 20-yr period of +1 °C relatively to the reference period 1980 – 1999 and MAR forced with MIROC5 over the reference period    |
| MARmir+1.5 | Anomalies between MAR forced with MIROC5 over a warmer 20-yr period of +1.5 °C relatively to the reference period 1980 – 1999 and MAR forced with MIROC5 over the reference period  |
| MARmir+2   | Anomalies between MAR forced with MIROC5 over a warmer 20-yr period of +2 °C relatively to the reference period 1980 – 1999 and MAR forced with MIROC5 over the reference period    |
| MARnor+1   | Anomalies between MAR forced with NorESM1 over a warmer 20-yr period of +1 °C relatively to the reference period 1980 – 1999 and MAR forced with MIROC5 over the reference period   |
| MARnor+1.5 | Anomalies between MAR forced with NorESM1 over a warmer 20-yr period of +1.5 °C relatively to the reference period 1980 – 1999 and MAR forced with MIROC5 over the reference period |
| MARnor+2   | Anomalies between MAR forced with NorESM1 over a warmer 20-yr period of +2 °C relatively to the reference period 1980 – 1999 and MAR forced with MIROC5 over the reference period   |
| MARcan+1   | Anomalies between MAR forced with CanESM2 over a warmer 20-yr period of +1 °C relatively to the reference period 1980 – 1999 and MAR forced with MIROC5 over the reference period   |
| MARcan+1.5 | Anomalies between MAR forced with CanESM2 over a warmer 20-yr period of +1.5 °C relatively to the reference period 1980 – 1999 and MAR forced with MIROC5 over the reference period |
| MARcan+2   | Anomalies between MAR forced with CanESM2 over a warmer 20-yr period of +2 °C relatively to the reference period 1980 – 1999 and MAR forced with MIROC5 over the reference period   |
